# Supplementary material for: Translational reprogramming as a driver of antimony-drug resistance in Leishmania
Source: PubMed Central journal article supplement (PMC10163012; doi:10.1038/s41467-023-38221-1), 2023-05-05
Supplement: 41467_2023_38221_MOESM3_ESM.pdf [file 41467_2023_38221_MOESM3_ESM.pdf]

## **Translational Reprogramming as a Driver of Antimony-drug Resistance in *Leishmania***

### **Supplementary files description:**

#### **File name: *Supplementary Data 1***

*Description:* Raw data of automatic polysome fractionation per experimental condition.

#### **File name: *Supplementary Data 2:***

*Description:* Differentially expressed genes detected in antimony-resistant parasites at the basal level (no drug challenge).

#### **File name: *Supplementary Data 3:***

*Description:* Raw data from Venn diagram summarizing the differentially expressed genes detected at the basal level (no drug challenge) per polysome fraction.

#### **File name: *Supplementary Data 4:***

*Description:* Comparison of the translome Vs. transcriptome (basal level).

#### **File name: *Supplementary Data 5:***

*Description:* Dataset of differentially expressed genes detected in antimony resistant parasites growing under drug challenge.

#### **File name: *Supplementary Data 6:***

*Description:* Raw data from Venn diagram summarizing the differentially expressed genes detected in antimony resistant parasites growing under drug challenge per polysome fraction.

#### **File name: *Supplementary Data 7:***

*Description:* Comparison of the translome Vs. transcriptome (drug challenge).

#### **File name: *Supplementary Data 8:***

*Description:* Dataset summarizing the normalized read counts by DESeq2's median of ratios.

**File name: *Supplementary Data 9:***

*Description:* List of primers used for the validation of translome analysis by RT-qPCR.

**File name: *Supplementary Data 10:***

*Description:* Comparison between translomic and proteomic analyses for resistant parasites growing under drug challenge.

**File name: *Supplementary Data 11:***

*Description:* Dataset summarizing known and potentially new antimony modulators

**File name: *SupplementaryData 12:***

*Description:* Raw data of gene ontology enrichment analysis.

**File name: *Supplementary Data 13:***

*Description:* Clustering analysis based on protein homology summarizing changes at the basal level (no drug challenge).

**File name: *Supplementary Data 14:***

*Description:* Clustering analysis based on protein co-expression summarizing changes at the basal level (no drug challenge).

**File name: *Supplementary Data 15:***

*Description:* Raw data for the glutathione metabolism STRING network dataset summarizing changes under drug challenge.

**File name: *Supplementary Data 16:***

*Description:* Manually grouped differentially translated transcripts detected in antimony resistant parasites growing under drug challenge.

***Supplementary Data 17:***

*Description:* Gene variants detected in antimony resistant parasites by using the FreeBayes algorithm.

***Supplementary Data 18:***

*Description:* Comparison between translatomic and variant calling analyses.
